# Supplementary material
Source: Elsevier journal article supplement (https://www.sciencedirect.com/science/article/pii/S0001731022001636)
Supplement: mmc1 [file S0001731022001636:mmc1.doc]

**Material suplementario, Tabla 1**. Características clínicas de los FXA.

| Caso | Hospital de origen | Edad (años) | Género | CCNM | Localización | Tamaño (mm) | Tiempo de evolución (meses) | Diagnóstico inicial | Diagnóstico final | Márgenes libres tras primera cirugía | Número de recurrencias | Localmente avanzado | Metástasis | Muerte por el tumor | Tiempo de seguimiento (meses) |
| --- | --- | --- | --- | --- | --- | --- | --- | --- | --- | --- | --- | --- | --- | --- | --- |
| 1 | HCUV | 84 | M | Sí | Cuero cabelludo | 25 | 3 | FXA | FXA | No | 0 | No | No | No | 31 |
| 2 | HCUV | 76 | M | Sí | Frente | 15 | 2 | FXA | FXA | No | 0 | No | No | No | 73 |
| 3 | HCUV | 87 | M | Sí | Sien | NA | 2 | FXA | FXA | Sí | 0 | No | No | No | 67 |
| 4 | HCUV | 81 | M | Sí | Escote | NA | NA | FXA | FXA | No | 0 | No | No | No | 190 |
| 5 | HCUV | 83 | M | Sí | Oreja | 9 | 1 | FXA | FXA | Sí | 0 | No | No | No | 36 |
| 6 | HCUV | 73 | M | Sí | Cuero cabelludo | 15 | 1 | FXA | FXA | No | 0 | No | No | No | 15 |
| 7 | HCUV | 79 | M | Sí | Cuero cabelludo | 12 | 1 | FXA | FXA | Sí | 0 | No | No | No | 20 |
| 8 | HCUV | 83 | M | Sí | Frente | 13 | 1 | FXA | FXA | Sí | 0 | No | No | No | 118 |
| 9 | HCUV | 88 | M | No | Cuero cabelludo | 13 | 2 | FXA | FXA | Sí | 0 | No | No | No | 66 |
| 10 | HCUV | 81 | M | Sí | Sien | NA | NA | FXA | FXA | Sí | 1 | No | No | No | 63 |
| 11 | HCUV | 78 | M | Sí | Cuero cabelludo | 25 | 2 | FXA | FXA | Sí | 0 | No | No | No | 24 |
| 12 | HCUV | 78 | M | Sí | Antebrazo | NA | 3 | FXA | FXA | Sí | 0 | No | No | No | 142 |
| 13 | HCUV | 72 | M | Sí | Sien | 24 | 1 | FXA | FXA | Sí | 0 | No | No | No | 26 |
| 14 | HCUV | 72 | M | Sí | Sien | NA | 2 | FXA | FXA | Sí | 0 | No | No | No | 26 |
| 15 | HCUV | 73 | M | Sí | Cuero cabelludo | 9 | 1 | FXA | FXA | Sí | 0 | No | No | No | 22 |
| 16 | HCUV | 54 | M | No | Cuero cabelludo | 13 | 3 | FXA | FXA | Sí | 0 | No | No | No | 20 |
| 17 | HCUV | 60 | M | Sí | Cuero cabelludo | 15 | 1 | FXA | FXA | No | 0 | No | No | No | 19 |
| 18 | HCUV | 73 | M | Sí | Cuero cabelludo | 15 | 3 | FXA | FXA | Sí | 0 | No | No | No | 16 |
| 19 | HCUV | 63 | M | Sí | Mejilla | 13 | 3 | FXA | FXA | No | 0 | No | No | No | 80 |
| 20 | HCUV | 91 | M | Sí | Cuero cabelludo | NA | NA | FXA | FXA | Sí | 0 | No | No | No | 78 |
| 21 | HCUV | 90 | M | Sí | Cuero cabelludo | 10 | NA | FXA | FXA | Sí | 0 | No | No | No | 43 |
| 22 | HCUV | 84 | M | Sí | Cuero cabelludo | 15 | 6 | FXA | FXA | Sí | 0 | No | No | No | 6 |
| 23 | HCUV | 77 | M | Sí | Cuero cabelludo | NA | 4 | FXA | FXA | No | 0 | No | No | No | 19 |
| 24 | HCUV | 73 | M | Sí | Cuero cabelludo | 30 | 2 | FXA | FXA | No | 0 | No | No | No | 11 |
| 25 | IVO | 72 | M | No | Sien | 20 | 48 | FXA | FXA | No | 2 | No | No | No | 4 |
| 26 | IVO | 85 | M | Sí | Sien | 17 | 0 | FXA | FXA | No | 1 | No | No | No | 45 |
| 27 | IVO | 79 | M | Sí | Oreja | 15 | 12 | FXA | FXA | Sí | 0 | No | No | No | 113 |
| 28 | IVO | 77 | M | Sí | Oreja | 11 |  | FXA | FXA | No | 0 | No | No | No | 15 |
| 29 | IVO | 87 | M | Sí | Cuero cabelludo | 10 | NA | FXA | FXA | No | 0 | No | No | No | 16 |
| 30 | IVO | 90 | M | Sí | Oreja | 7 | NA | FXA | FXA | Sí | 0 | No | No | No | 22 |
| 31 | IVO | 93 | M | No | Cuero cabelludo | 20 | NA | FXA | FXA | No | 0 | No | No | No | 3 |
| 32 | IVO | 46 | M | Sí | Escápula | 15 | 40 | FXA | FXA | No | 1 | No | No | No | 228 |
| 33 | IVO | 81 | M | Sí | Cuero cabelludo | 15 | 6 | FXA | FXA | Sí | 0 | No | No | No | 10 |
| 34 | IVO | 72 | F | No | Sien | 15 | 3 | FXA | FXA | Sí | 0 | No | No | No | NA |
| 35 | IVO | 76 | M | Sí | Mejilla | 10 | 2 | FXA | FXA | Sí | 0 | No | No | No | 23 |
| 36 | IVO | 76 | M | Sí | Nariz | 5 | 6 | FXA | FXA | No | 0 | No | No | No | 1 |
| 37 | IVO | 78 | M | Sí | Retroauricular | 25 | 6 | FXA | FXA | Sí | 0 | No | No | No | 23 |
| 38 | IVO | 75 | M | Sí | Nariz | 10 | NA | FXA | FXA | No | 0 | No | No | No | 21 |
| 39 | IVO | 70 | M | No | Cuero cabelludo | 12 | 3 | FXA | FXA | Sí | 0 | No | No | No | 11 |
| 40 | IVO | 82 | M | Sí | Cuero cabelludo | 18 | 3 | FXA | FXA | Sí | 0 | No | No | No | 3 |
| 41 | IVO | 77 | M | Sí | Nariz | 13 | 3 | FXA | FXA | Sí | 0 | No | No | No | 3 |
| 42 | IVO | 78 | M | Sí | Cuero cabelludo | NA | NA | FXA | FXA | Sí2 | 0 | No | No | No | 3 |
| 43 | IVO | 83 | M | No | Cuero cabelludo | 15 | NA | FXA | FXA | No | 0 | No | No | No | 12 |

***Material suplementario, Tabla 1****. Características clínicas de los FXA: CCNM (cáncer de piel no melanoma); M (masculino); F (femenino); NA (sin especificar).*

**Material suplementario, Tabla 2**. Características clínicas de los SPD.

| Caso | Hospital de origen | Edad (años) | Género | CCNM | Localización | Tamaño (mm) | Tiempo de evolución (meses) | Diagnóstico inicial | Diagnóstico final | Márgenes libres tras primera cirugía | Número de recurrencias | Localmente avanzado | Metástasis | Muerte por el tumor | Tiempo de seguimiento (meses) |
| --- | --- | --- | --- | --- | --- | --- | --- | --- | --- | --- | --- | --- | --- | --- | --- |
| 1 | HCUV | 85 | M | Sí | Cuero cabelludo | 30 | 3 | SPD | SPD | No | 0 | No | No | No | 20 |
| 2 | HCUV | 86 | M | No | Cuero cabelludo | 25 | 11 | SPD | SPD | No | 0 | No | No | No | 21 |
| 3 | HCUV | 75 | M | Sí | Frente | 23 | 2 | SPD | SPD | Sí | 0 | No | No | No | 31 |
| 4 | HCUV | 81 | M | Sí | Sien | 22 | 4 | FXA | SPD | No | 1 | No | Sí | Sí | 53 |
| 5 | HCUV | 66 | M | Sí | Cuero cabelludo | 17 | 2 | FXA | SPD | No | 0 | No | No | No | 16 |
| 6 | HCUV | 80 | M | Sí | Cuero cabelludo | 23 | 3 | FXA | SPD | Sí | 0 | No | No | No | No |
| 7 | HCUV | 82 | M | Sí | Cuero cabelludo | 17 | 3 | SPD | SPD | Sí | 0 | No | No | No | No |
| 8 | HCUV | 78 | M | Sí | Cuero cabelludo | 25 | 2 | SPD | SPD | Sí | 0 | No | No | No | 24 |
| 9 | HCUV | 85 | M | Sí | Cuero cabelludo | 20 | 3 | SPD | SPD | No | 0 | No | No | No | 39 |
| 10 | HCUV | 94 | F | Sí | Oreja | 28 | NA | FXA | SPD | No | 0 | No | No | No | 103 |
| 11 | IVO | 70 | M | Sí | Cuero cabelludo | 13 | 2 | FXA | SPD | Sí | 1 | No | No | No | 105 |
| 12 | IVO | 79 | M | No | Cuero cabelludo | 60 | 14 | FXA | SPD | No | 2 | Sí | No | No | 21 |
| 13 | IVO | 80 | M | Sí | Frente | 20 | 4 | FXA | SPD | No | 2 | Sí | No | No | 60 |
| 14 | IVO | 85 | M | No | Nariz | 20 | 6 | SPD | SPD | No | 0 | No | No | No | 12 |
| 15 | IVO | 84 | M | No | Oreja | 39 | 6 | FXA | SPD | Sí | 2 | Sí | No | No | 1 |
| 16 | IVO | 80 | M | Sí | Cuero cabelludo | 26 | 0 | FXA | SPD | No | 2 | Sí | No | No | 53 |
| 17 | IVO | 70 | M | No | Cuero cabelludo | NA | 12 | FXA | SPD | No | 2 | No | Sí | Sí | 16 |
| 18 | IVO | 84 | M | Sí | Cuero cabelludo | 32 | 6 | FXA | SPD | Sí | 2 | Sí | Sí | Sí | 17 |
| 19 | IVO | 71 | F | SÍ | Nariz | 30 | 3 | FXA | SPD | No | 1 | No | No | No | 24 |
| 20 | IVO | 93 | M | Sí | Cuero cabelludo | 39 | 6 | SPD | SPD | No | 2 | Sí | No | No | 14 |
| 21 | IVO | 71 | M | No | Oreja | 13 | 6 | FXA | SPD | No | 1 | Sí | Sí | No | 1 |
| 22 | IVO | 85 | F | Sí | Sien | 19 | 6 | FXA | SPD | Sí | 2 | No | No | No | 3 |
| 23 | IVO | 89 | M | Sí | Cuero cabelludo | 13 | 0 | FXA | SPD | Sí | 0 | No | No | No | 3 |
| 24 | IVO | 75 | M | Sí | Cuero cabelludo | 17 | 0 | FXA | SPD | No | 1 | No | No | No | 70 |
| 25 | IVO | 85 | M | No | Cuero cabelludo | 35 | 3 | SPD | SPD | Sí | 0 | Sí | No | No | 10 |
| 26 | IVO | 86 | M | Sí | Cuero cabelludo | 15 | 0 | SPD | SPD | Sí | 0 | No | No | No | 22 |
| 27 | IVO | 84 | M | V | Cuero cabelludo | 40 | 2 | SPD | SPD | Sí | 0 | No | No | No | 99 |
| 28 | IVO | 68 | M | Sí | Cuero cabelludo | 15 | NA | FXA | SPD | No | 0 | No | No | No | 118 |
| 29 | IVO | 76 | M | Sí | Cuero cabelludo | 10 | NA | FXA | SPD | Sí | 0 | No | No | No | 21 |
| 30 | IVO | 91 | M | Sí | Cuero cabelludo | 35 | 9 | SPD | SPD | No | 0 | No | No | No | 3 |
| 31 | IVO | 83 | M | Sí | Cuero cabelludo | 35 | 12 | FXA | SPD | Sí | 0 | No | No | No | 1 |

***Material suplementario, Tabla 2.*** *Características clínicas de los SPD:**CCNM (cáncer de piel no melanoma); M (masculino); F (femenino); NA (sin especificar).*

**Material suplementario, Tabla 3.** Características histológicas de los FXA.

| Caso | Hospital origen | Breslow | Grado pleomorfismo | Zona invasión máxima | Mitosis | Tipo infiltrado | Cuantía infiltrado | Predominio infiltrado | Ulceración | Patrón de crecimiento | Predominio celular | Necrosis | Invasión TCS | Invasión vascular | Infiltración perineural |
| --- | --- | --- | --- | --- | --- | --- | --- | --- | --- | --- | --- | --- | --- | --- | --- |
| 1 | HCUV | 5,3 | Moderado | Dermis | 8 | Mixto | Leve | Peritumoral | Presente | Expansivo | Fusocelular | Ausente | Ausente | Ausente | Ausente |
| 2 | HCUV | 4,5 | Moderado | Dermis | 4 | Linfocitos | Moderado | Peritumoral | Ausente | Expansivo | Fusocelular | Ausente | Ausente | Ausente | Ausente |
| 3 | HCUV | 2,3 | Moderado | Dermis | 4 | Mixto | Intenso | Peritumoral | Ausente | Expansivo | Epitelioide | Ausente | Ausente | Ausente | Ausente |
| 4 | HCUV | 1,2 | NA | Dermis | 8 | Linfocitos | Moderado | Peritumoral | Ausente | Expansivo | Fusocelular | Ausente | Ausente | Ausente | Ausente |
| 5 | HCUV | 3,9 | Moderado | Dermis | 9 | NA (escaso) | Muy escaso | Peritumoral | Ausente | Expansivo | Fusocelular | Ausente | Ausente | Ausente | Ausente |
| 6 | HCUV | 6,5 | Moderado | Dermis | 17 | Mixto | Moderado | Peritumoral | Ausente | Expansivo | Fusocelular | Ausente | Ausente | Ausente | Ausente |
| 7 | HCUV | 4,3 | Moderado | Dermis | 9 | Linfocitos | Moderado | Peritumoral | Presente | Infiltrativo | Fusocelular | Ausente | Ausente | Ausente | Ausente |
| 8 | HCUV | 4,1 | Moderado | Dermis | 12 | Eosinófilos | Moderado | Peritumoral | Presente | Expansivo | Fusocelular | Ausente | Ausente | Ausente | Ausente |
| 9 | HCUV | 4,3 | Moderado | Dermis | 6 | Mixto | Leve | Peritumoral | Ausente | Expansivo | Fusocelular | Ausente | Ausente | Ausente | Ausente |
| 10 | HCUV | 5,5 | Moderado | Dermis | 7 | Mixto | Leve | Peritumoral | Presente | Expansivo | Fusocelular | Ausente | Ausente | Ausente | Ausente |
| 11 | HCUV | 6,6 | Moderado | Dermis | 8 | Mixto | Leve | Peritumoral | Ausente | Expansivo | Fusocelular | Ausente | Ausente | Ausente | Ausente |
| 12 | HCUV | 2,9 | Intenso | Dermis | 17 | Mixto | Leve | Intratumoral | Presente | Expansivo | Mixto | Ausente | Ausente | Ausente | Ausente |
| 13 | HCUV | 4,5 | Leve | Dermis | 27 | Mixto | Leve | Peritumoral | Presente | Expansivo | Fusocelular | Ausente | Ausente | Ausente | Ausente |
| 14 | HCUV | 3,3 | Moderado | Dermis | 5 | Mixto | Moderado | Mixto | Presente | Infiltrativo | Fusocelular | Ausente | Ausente | Ausente | Ausente |
| 15 | HCUV | 2 | Intenso | Dermis | 23 | Mixto | Moderado | Peritumoral | Presente | Expansivo | Fusocelular | Ausente | Ausente | Ausente | Ausente |
| 16 | HCUV | 4,1 | Intenso | Dermis | 14 | Mixto | Moderado | Peritumoral | Presente | Expansivo | Fusocelular | Ausente | Ausente | Ausente | Ausente |
| 17 | HCUV | 2,2 | Intenso | Dermis | 28 | Linfocitos | Leve | Peritumoral | Presente | Expansivo | Fusocelular | Ausente | Ausente | Ausente | Ausente |
| 18 | HCUV | 4,3 | Intenso | Dermis | 6 | Mixto | Moderado | Peritumoral | Presente | Expansivo | Epitelioide | Ausente | Ausente | Ausente | Ausente |
| 19 | HCUV | 4,3 | Moderado | Dermis | 14 | Linfocitos | Moderado | Peritumoral | Ausente | Expansivo | Fusocelular | Ausente | Ausente | Ausente | Ausente |
| 20 | HCUV | 8 | Moderado | Dermis | 24 | Mixto | Moderado | Peritumoral | Ausente | Expansivo | Fusocelular | Ausente | Ausente | Ausente | Ausente |
| 21 | HCUV | 2,9 | Intenso | Dermis | 7 | Mixto | Moderado | Peritumoral | Ausente | Expansivo | Fusocelular | Ausente | Ausente | Ausente | Ausente |
| 22 | HCUV | 3 | Moderado | Dermis | 13 | Mixto | Moderado | Peritumoral | Presente | Expansivo | Fusocelular | Ausente | Ausente | Ausente | Ausente |
| 23 | HCUV | 3,2 | Intenso | Dermis | 12 | Mixto | Moderado | Peritumoral | Presente | Expansivo | Epitelioide | Ausente | Ausente | Ausente | Ausente |
| 24 | HCUV | 3,8 | Moderado | Dermis | 15 | Mixto | Leve | Peritumoral | Presente | Expansivo | Epitelioide | Ausente | Ausente | Ausente | Ausente |
| 25 | IVO | 4,4 | Intenso | Dermis | 3 | Linfocitos | Leve | Mixto | Presente | Infiltrativo | Epitelioide | Ausente | Ausente | Ausente | Ausente |
| 26 | IVO | 4,3 | Moderado | Dermis | 42 | Plasmocitos | Moderado | Mixto | Presente | Expansivo | Mixto | Ausente | Ausente | Ausente | Ausente |
| 27 | IVO | 6 | Intenso | Dermis | 8 | Linfocitos | Leve | Peritumoral | Ausente | Expansivo | Mixto | Ausente | Ausente | Ausente | Ausente |
| 28 | IVO | 1,9 | Moderado | Dermis | 6 | Mixto | Leve | Peritumoral | Ausente | Expansivo | Epitelioide | Ausente | Ausente | Ausente | Ausente |
| 29 | IVO | 1,2 | Intenso | Dermis | 6 | Plasmocitos | Leve | Intratumoral | Presente | Infiltrativo | Epitelioide | Ausente | Ausente | Ausente | Ausente |
| 30 | IVO | 2,4 | Moderado | Dermis | 5 | Mixto | Moderado | Mixto | Ausente | Infiltrativo | Epitelioide | Ausente | Ausente | Ausente | Ausente |
| 31 | IVO | 3,6 | Intenso | Dermis | 8 | Linfocitos | Leve | Intratumoral | Presente | Expansivo | Mixto | Ausente | Ausente | Ausente | Ausente |
| 32 | IVO | 3 | Leve | Dermis | 1 | Plasmocitos | Moderado | Peritumoral | Ausente | Infiltrativo | Fusocelular | Ausente | Ausente | Ausente | Ausente |
| 33 | IVO | 7,3 | Moderado | Dermis | 14 | Plasmocitos | Moderado | Intratumoral | Presente | Expansivo | Mixto | Ausente | Ausente | Ausente | Ausente |
| 34 | IVO | 7 | Moderado | Dermis | 18 | Linfocitos | Leve | Peritumoral | Presente | Expansivo | Epitelioide | Ausente | Ausente | Ausente | Ausente |
| 35 | IVO | 4,6 | Intenso | Dermis | 6 | Mixto | Intenso | Mixto | Ausente | Expansivo | Fusocelular | Ausente | Ausente | Ausente | Ausente |
| 36 | IVO | 2 | Moderado | Dermis | 5 | Linfocitos | Moderado | Mixto | Ausente | Infiltrativo | Epitelioide | Ausente | Ausente | Ausente | Ausente |
| 37 | IVO | 6,2 | Intenso | Dermis | 79 | Mixto | Moderado | Peritumoral | Presente | Expansivo | Fusocelular | Ausente | Ausente | Ausente | Ausente |
| 38 | IVO | 1,5 | Moderado | Dermis | 4 | Linfocitos | Leve | Peritumoral | Ausente | Infiltrativo | Fusocelular | Ausente | Ausente | Ausente | Ausente |
| 39 | IVO | 4,4 | Moderado | Dermis | 22 | Plasmocitos | Intenso | Mixto | Presente | Expansivo | Fusocelular | Ausente | Ausente | Ausente | Ausente |
| 40 | IVO | 6,4 | Moderado | Dermis | 3 | Linfocitos | Intenso | Peritumoral | Presente | Expansivo | Fusocelular | Ausente | Ausente | Ausente | Ausente |
| 41 | IVO | NA | NA | Dermis | NA | NA | NA | NA | Ausente | Expansivo | Epitelioide | Ausente | Ausente | Ausente | Ausente |
| 42 | IVO | 2,5 | Moderado | Dermis | 3 | Mixto | Moderado | Peritumoral | Presente | Expansivo | Fusocelular | Ausente | Ausente | Ausente | Ausente |
| 43 | IVO | NA | Moderado | Dermis | NA | NA | NA | NA | Presente | Expansivo | Epitelioide | Ausente | Ausente | Ausente | Ausente |

***Material suplementario, Tabla 3.*** *Características histológicas de los FXA:**NA (sin especificar); Breslow (en mm); Mitosis (número de mitosis en 10 campos de gran aumento); TCS (tejido celular subcutáneo).*

**Material suplementario, Tabla 4.** Características histológicas de los SPD.

| Caso | Hospital Origen | Breslow | Grado pleomorfismo | Zona invasión máxima | Mitosis | Tipo infiltrado | Cuantía infiltrado | Predominio infiltrado | Ulceración | Patrón de crecimiento | Predominio celular | Necrosis | Invasión TCS | Invasión vascular | Infiltración perineural |
| --- | --- | --- | --- | --- | --- | --- | --- | --- | --- | --- | --- | --- | --- | --- | --- |
| 1 | HCUV | 12,7 | Moderado | Galea | 27 | Mixto | Moderado | Peritumoral | Presente | Expansivo | Fusocelular | Presente | Presente | Ausente | Ausente |
| 2 | HCUV | 7,2 | Moderado | TCS | 15 | Mixto | Moderado | Peritumoral | Ausente | Infiltrativo | Fusocelular | Ausente | Presente | Ausente | Presente |
| 3 | HCUV | 6,1 | Moderado | TCS | 12 | Linfocitos | Leve | Peritumoral | Presente | Infiltrativo | Fusocelular | Presente | Presente | Presente | Presente |
| 4 | HCUV | 15,5 | Moderado | TCS | 15 | Linfocitos | Moderado | Mixto | Ausente | Infiltrativo | Fusocelular | Ausente | Presente | Presente | Ausente |
| 5 | HCUV | 5,3 | Moderado | Dermis | 24 | Mixto | Moderado | Peritumoral | Presente | Infiltrativo | Epitelioide | Presente | Ausente | Ausente | Ausente |
| 6 | HCUV | NA | Moderado | Galea | 32 | Linfocitos | Leve | Intratumoral | Presente | Expansivo | Fusocelular | Ausente | Presente | Presente | Ausente |
| 7 | HCUV | 4,4 | Moderado | Galea | 5 | Mixto | Leve | Peritumoral | Ausente | Expansivo | Fusocelular | Ausente | Presente | Ausente | Ausente |
| 8 | HCUV | 10,7 | Moderado | TCS | 12 | Mixto | Moderado | Peritumoral | Presente | Expansivo | Mixto | Ausente | Presente | Presente | Ausente |
| 9 | HCUV | NA | Intenso | TCS | 1 | Mixto | Leve | Peritumoral | Presente | Infiltrativo | Fusocelular | Ausente | Presente | Ausente | Ausente |
| 10 | HCUV | 8,7 | Intenso | TCS | 4 | Mixto | Leve | Peritumoral | Ausente | Infiltrativo | Fusocelular | Ausente | Presente | Ausente | Ausente |
| 11 | IVO | 3,9 | Moderado | TCS | 19 | Plasmocitos | Leve | Peritumoral | Presente | Expansivo | Fusocelular | Ausente | Presente | Ausente | Ausente |
| 12 | IVO | 4 | Moderado | Galea | 28 | Eosinófilos | Moderado | Intratumoral | Presente | Infiltrativo | Epitelioide | Presente | Presente | Presente | Presente |
| 13 | IVO | NA | Moderado | Galea | 20 | Plasmocitos | Leve | Peritumoral | Ausente | Infiltrativo | Fusocelular | Ausente | Presente | Ausente | Presente |
| 14 | IVO | 3,7 | Moderado | TCS | 15 | Plasmocitos | Moderado | Peritumoral | Ausente | Expansivo | Fusocelular | Ausente | Presente | Ausente | Ausente |
| 15 | IVO | 12 | Moderado | Cartílago | 24 | Mixto | Leve | Intratumoral | Presente | Infiltrativo | Fusocelular | Presente | Presente | Ausente | Ausente |
| 16 | IVO | 5 | Intenso | Galea | 25 | Mixto | Moderado | Peritumoral | Presente | Infiltrativo | Mixto | Presente | Presente | Ausente | Presente |
| 17 | IVO | 9,3 | Moderado | TCS | 30 | Plasmocitos | Moderado | Peritumoral | Ausente | Infiltrativo | Fusocelular | Ausente | Presente | Ausente | Ausente |
| 18 | IVO | NA | Intenso | Músculo | 12 | Plasmocitos | Leve | Intratumoral | Presente | Infiltrativo | Fusocelular | Presente | Presente | Presente | Presente |
| 19 | IVO | 7,3 | Moderado | Cartílago | 21 | Mixto | Leve | Peritumoral | Ausente | Infiltrativo | Fusocelular | Ausente | Presente | Presente | Presente |
| 20 | IVO | 10 | Intenso | Galea | 13 | Neutrófilos | Intenso | Intratumoral | Presente | Infiltrativo | Fusocelular | Presente | Presente | Presente | Presente |
| 21 | IVO | 14 | Moderado | Cartílago | 18 | Mixto | Leve | Peritumoral | Presente | Infiltrativo | Fusocelular | Presente | Presente | Presente | Presente |
| 22 | IVO | 5 | Intenso | TCS | 35 | Linfocitos | Leve | Intratumoral | Ausente | Infiltrativo | Epitelioide | Presente | Presente | Presente | Ausente |
| 23 | IVO | 6 | Moderado | TCS | 19 | Linfocitos | Leve | Intratumoral | Presente | Infiltrativo | Fusocelular | Ausente | Presente | Ausente | Ausente |
| 24 | IVO | 8,5 | Moderado | TCS | 11 | Mixto | Moderado | Mixto | Ausente | Infiltrativo | Fusocelular | Ausente | Presente | Ausente | Ausente |
| 25 | IVO | 7,8 | Moderado | Galea | 18 | Linfocitos | Moderado | Mixto | Presente | Expansivo | Fusocelular | Ausente | Presente | Presente | Presente |
| 26 | IVO | 12 | Moderado | TCS | 9 | Linfocitos | Moderado | Intratumoral | Ausente | Expansivo | Mixto | Ausente | Presente | Ausente | Ausente |
| 27 | IVO | 9,5 | Moderado | TCS | 57 | Mixto | Leve | Intratumoral | Presente | Infiltrativo | Fusocelular | Ausente | Presente | Ausente | Ausente |
| 28 | IVO | 5 | Intenso | TCS | 5 | Mixto | Intenso | Mixto | Presente | Infiltrativo | Mixto | Ausente | Presente | Ausente | Ausente |
| 29 | IVO | 5,6 | Leve | TCS | 17 | Mixto | Leve | Intratumoral | Ausente | Infiltrativo | Epitelioide | Ausente | Presente | Ausente | Ausente |
| 30 | IVO | NA | NA | NA | NA | NA | NA | NA | Presente | NA | Fusocelular | Ausente | Presente | Ausente | Ausente |
| 31 | IVO | NA | Moderado | TCS | NA | NA | NA | NA | Presente | Infiltrativo | Fusocelular | Ausente | Presente | Ausente | Ausente |

***Material suplementario, Tabla 4.*** *Características histológicas de los SPD:**NA (sin especificar); Breslow (en mm); Mitosis (número de mitosis en 10 campos de gran aumento); TCS (tejido celular subcutáneo).*
